# Supplementary material for: The establishment of in vitro culture and drug screening systems for a newly isolated strain of Trypanosoma equiperdum
Source: PubMed Central journal article supplement — Int J Parasitol Drugs Drug Resist. 2017 Apr 13;7(2):200–5. doi: 10.1016/j.ijpddr.2017.04.002 (PMC5403793; doi:10.1016/j.ijpddr.2017.04.002), 2017-04-13

# Supplemental Fig. 1.

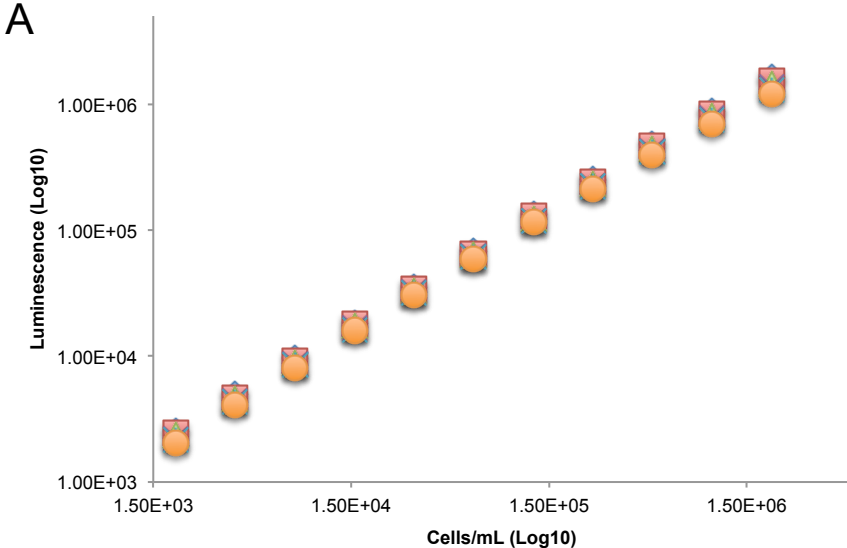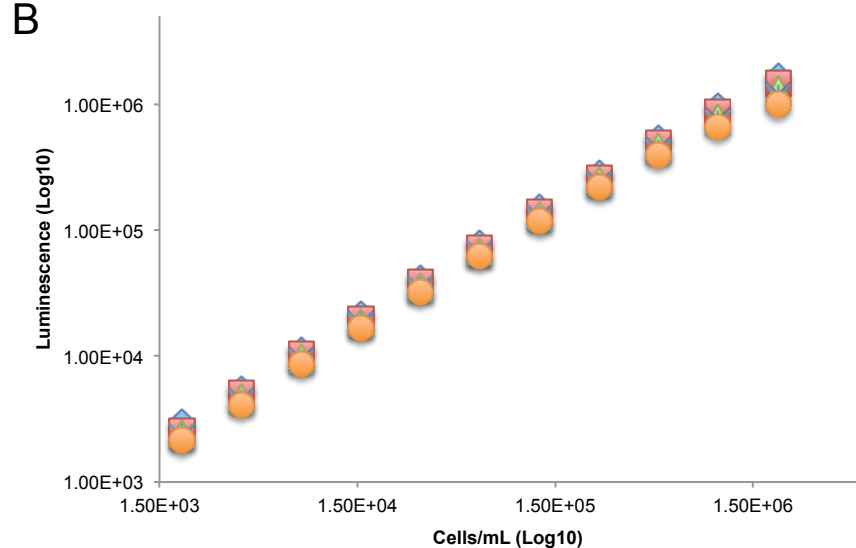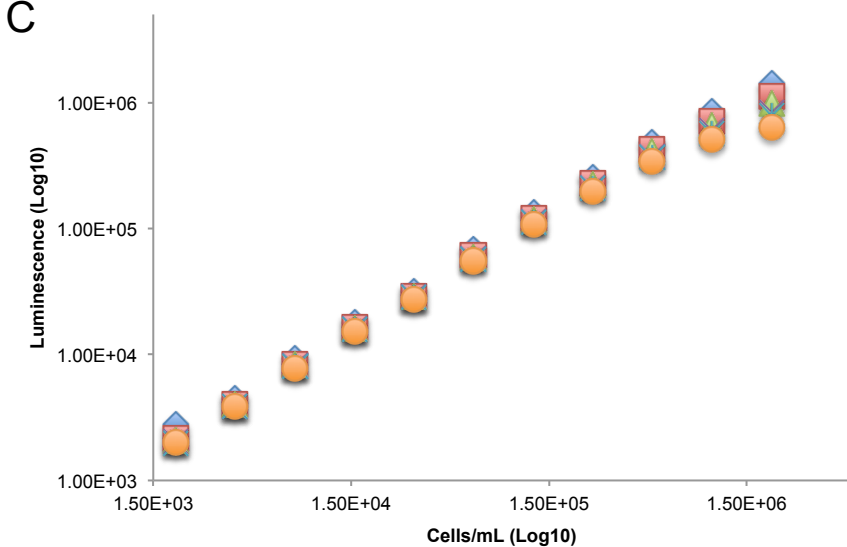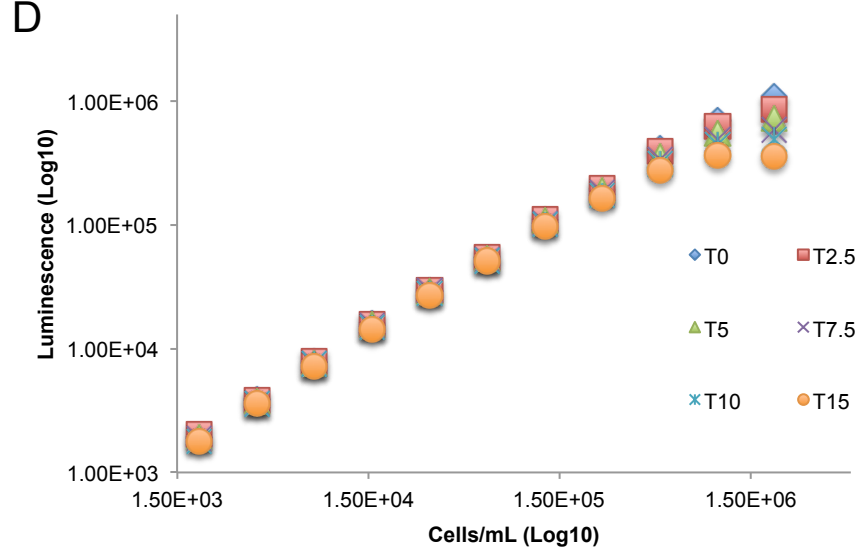

Supplemental Fig. 2.

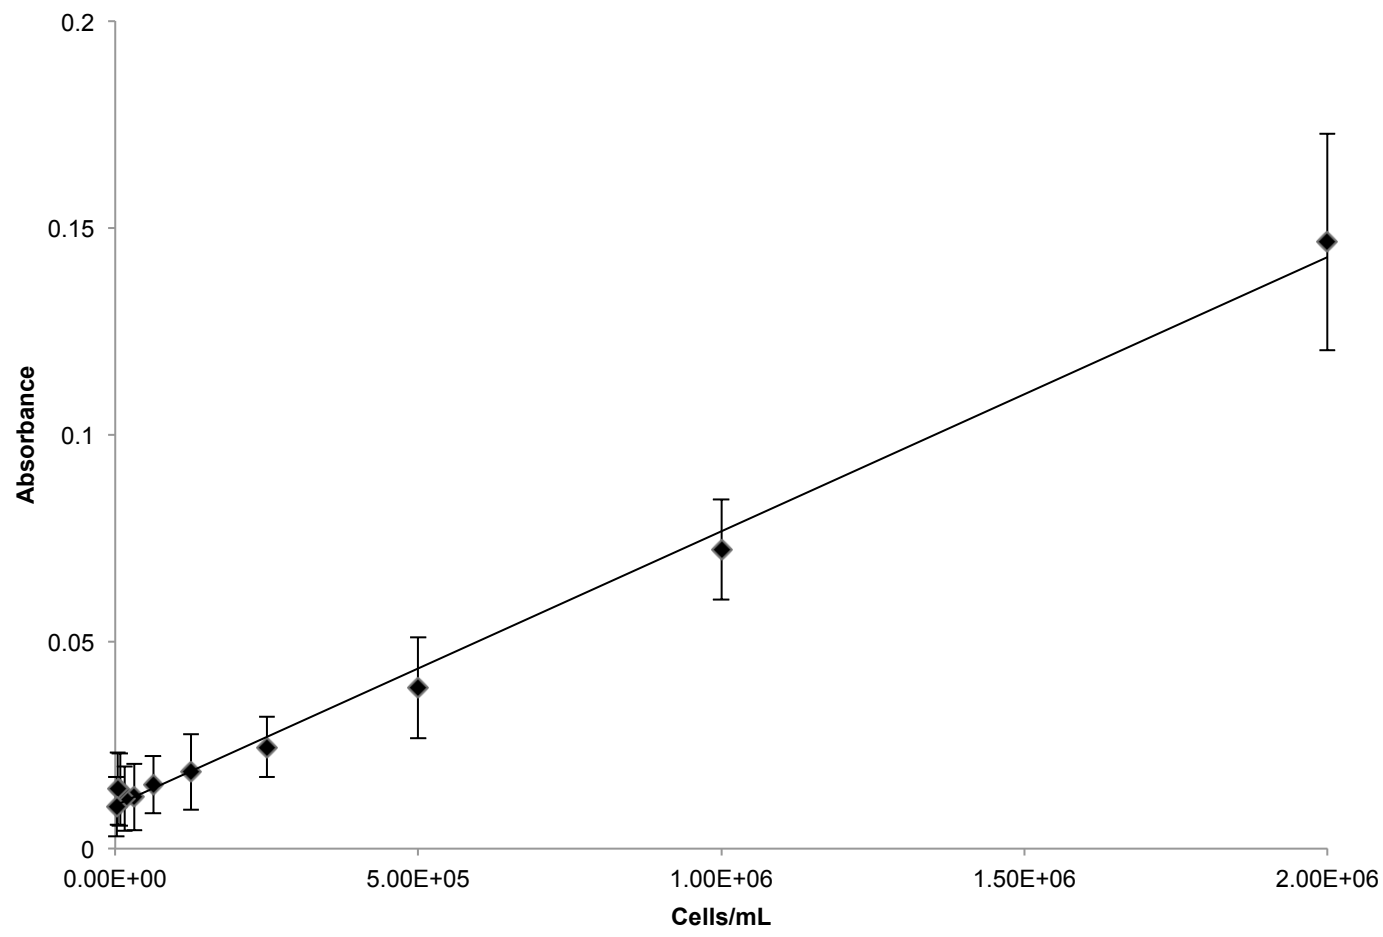

# Supplemental Fig. 3. Pentamidine

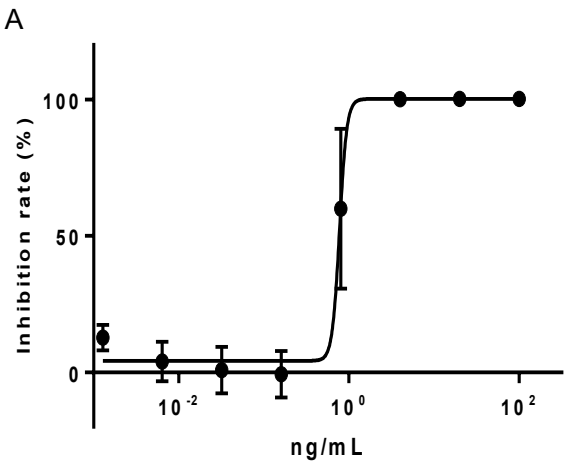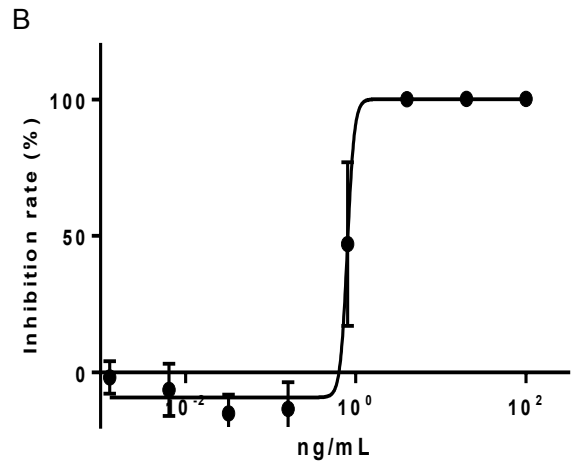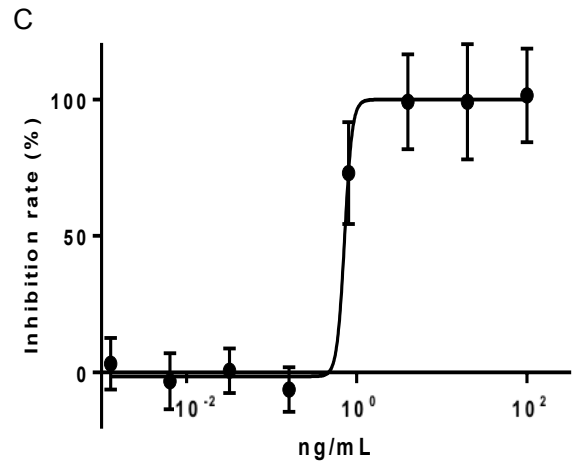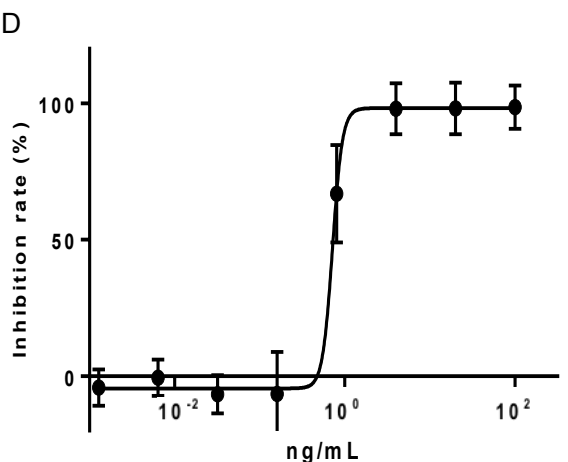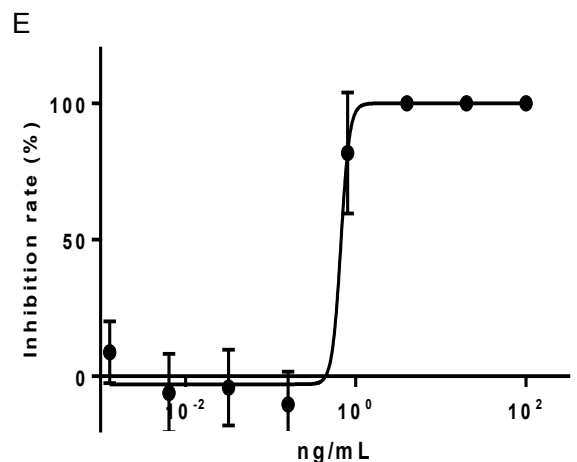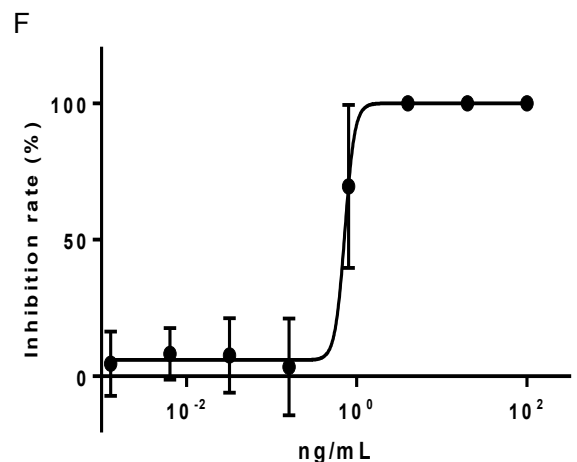

# Supplemental Fig. 4. Diminazene

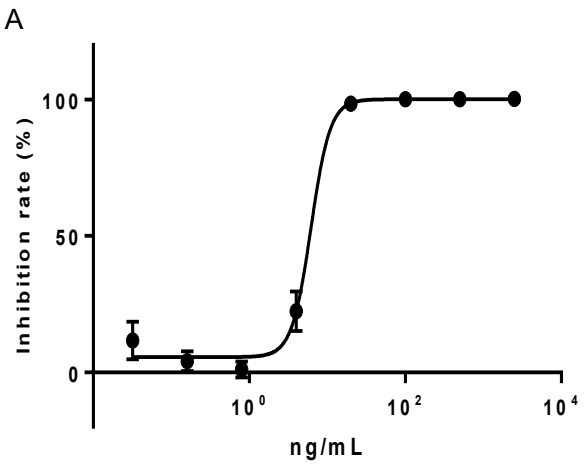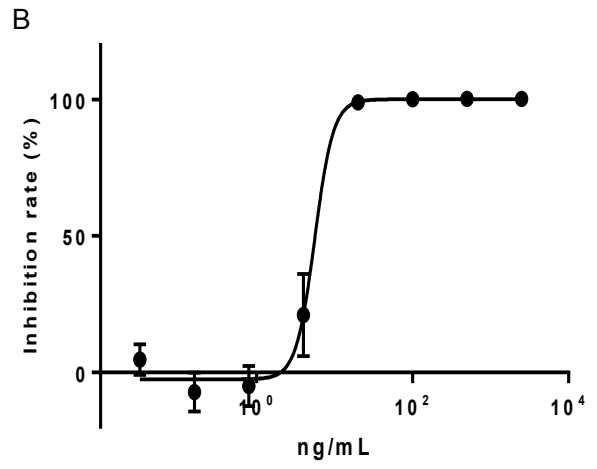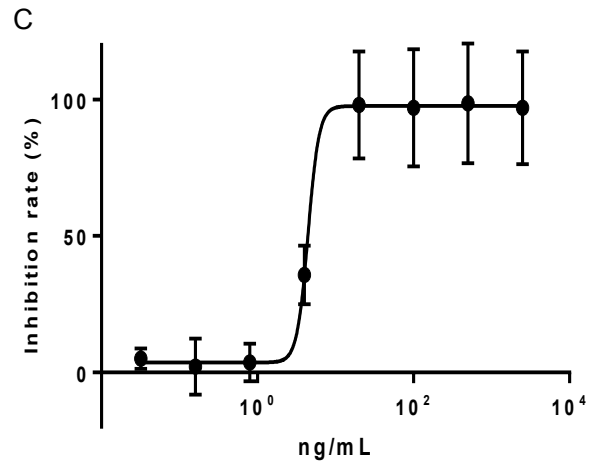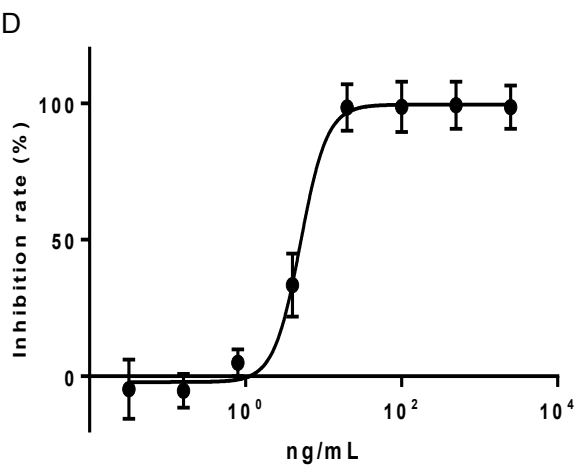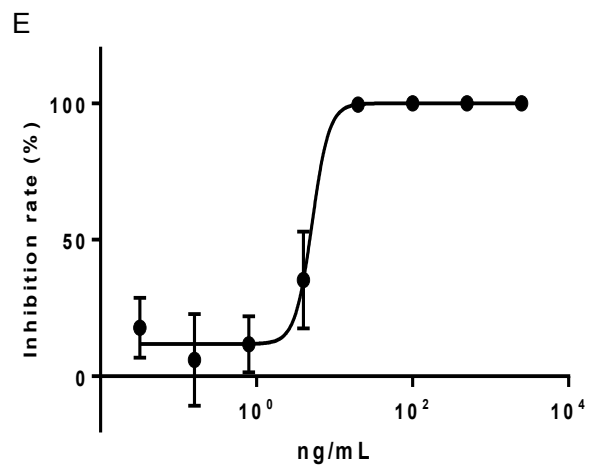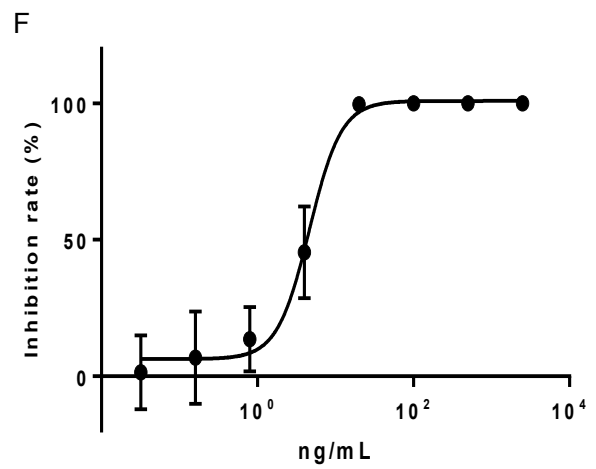

# Supplemental Fig. 5. Suramin

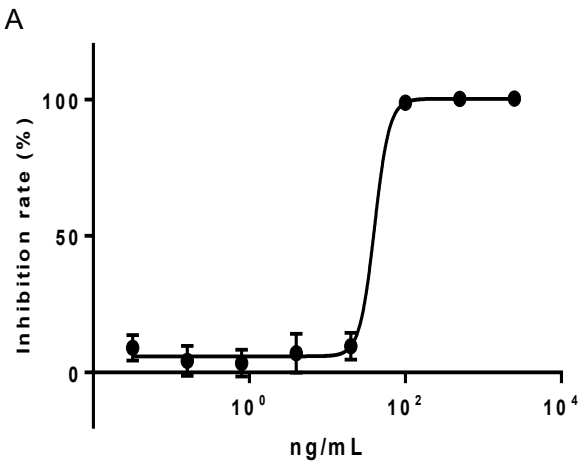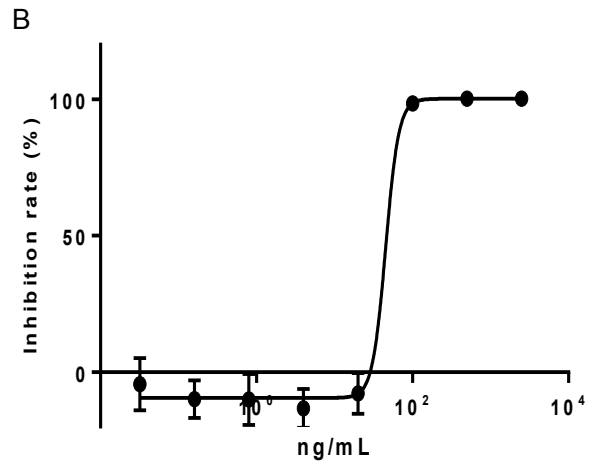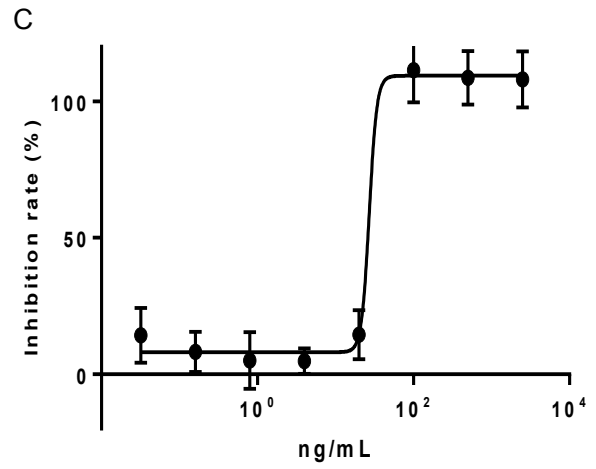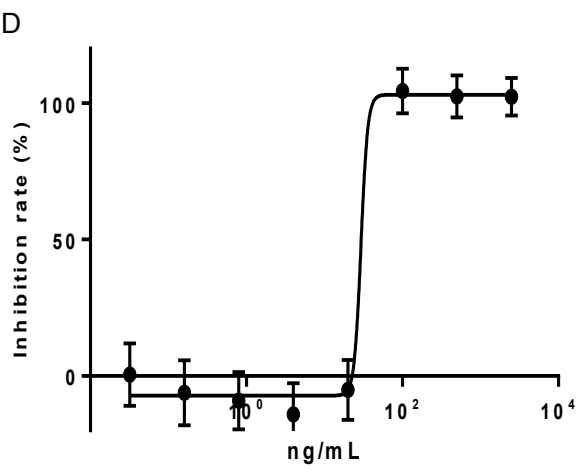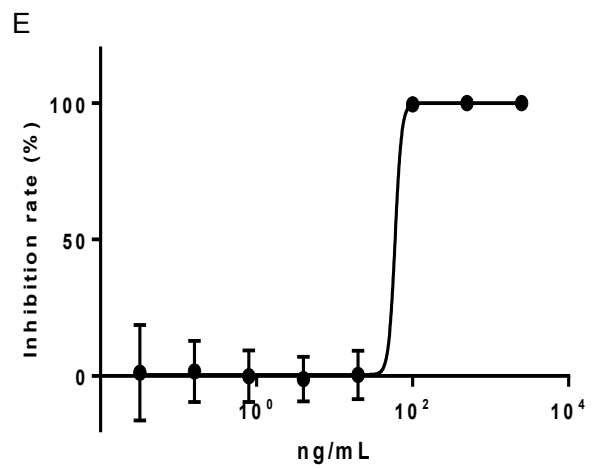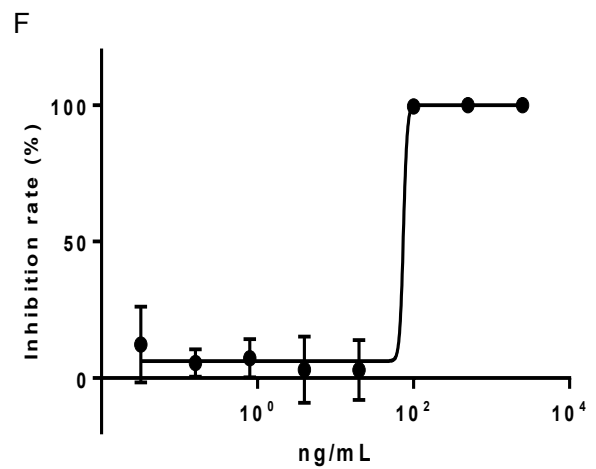

# Supplemental Fig. 6. Melarsomine

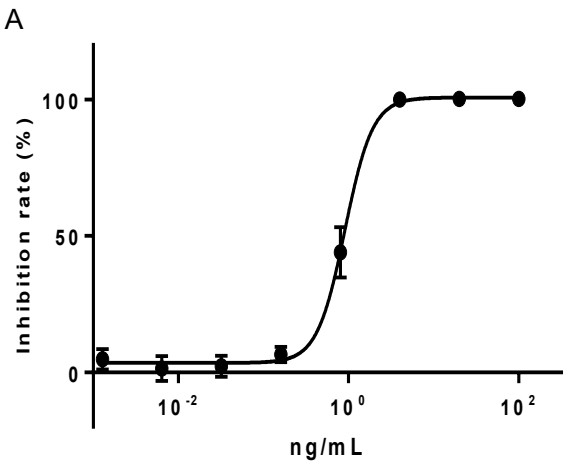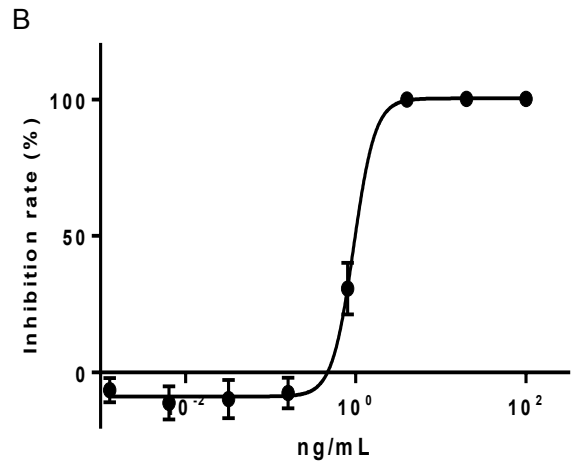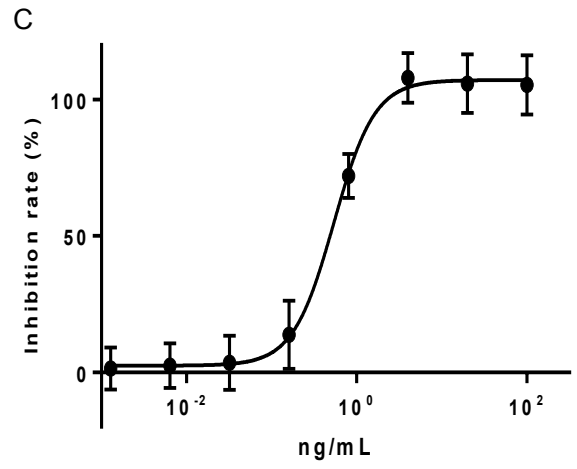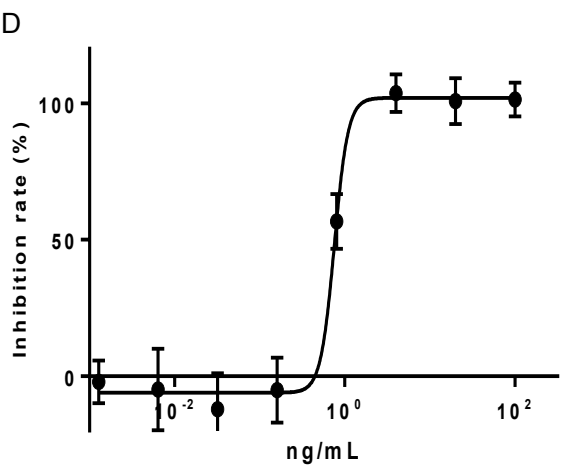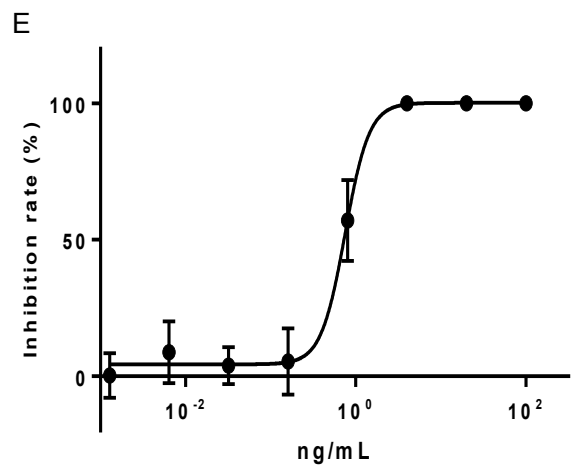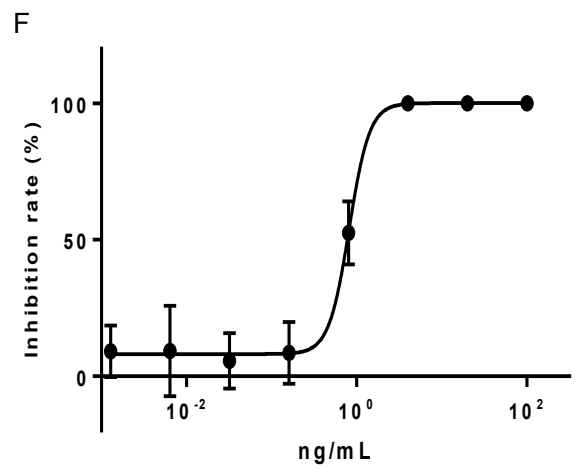

Supplement: mmc2.pdf [file mmc2.pdf]
